# Supplementary material for: Modelling the network of cell cycle transcription factors in the yeast Saccharomyces cerevisiae
Source: Springer Nature journal article supplement (doi:10.1186/1471-2105-7-381), 2006-08-16
Supplement: 12859_2006_1120_MOESM4_ESM.pdf [file 12859_2006_1120_MOESM4_ESM.pdf]

*TF name*      *Periodicity*      *Significant time points*      *Color*

| <b><i>p</i> = 0.1</b> |          |    |        |  |
|-----------------------|----------|----|--------|--|
| Ndd1                  | 0.300523 | 14 | red    |  |
| Swi6                  | 0.315040 | 13 | red    |  |
| Swi5                  | 0.204111 | 13 | red    |  |
| Swi4                  | 0.327208 | 12 | red    |  |
| Mbp1                  | 0.297817 | 12 | red    |  |
| Ace2                  | 0.294236 | 10 | red    |  |
| Bas1                  | 0.209138 | 10 | yellow |  |
| Ste12                 | 0.262012 | 9  | yellow |  |
| Spt2                  | 0.240477 | 9  | yellow |  |
| Yox1                  | 0.193717 | 9  | yellow |  |
| Fkh1                  | 0.165331 | 9  | yellow |  |
| Abf1                  | 0.090864 | 9  | white  |  |
| Msn4                  | 0.082289 | 9  | white  |  |
| Mcm1                  | 0.269384 | 7  | red    |  |
| Fkh2                  | 0.256734 | 6  | red    |  |

| <b><i>p</i> = 0.01</b> |          |    |        |  |
|------------------------|----------|----|--------|--|
| Ndd1                   | 0.298176 | 14 | red    |  |
| Swi6                   | 0.322294 | 13 | red    |  |
| Swi5                   | 0.221195 | 13 | red    |  |
| Swi4                   | 0.318195 | 12 | red    |  |
| Mbp1                   | 0.284134 | 12 | red    |  |
| Ace2                   | 0.298886 | 10 | red    |  |
| Bas1                   | 0.191755 | 10 | yellow |  |
| Fkh1                   | 0.229689 | 9  | yellow |  |
| Yox1                   | 0.177898 | 9  | yellow |  |
| Msn4                   | 0.076258 | 9  | white  |  |
| Ste12                  | 0.234691 | 8  | yellow |  |
| Spt2                   | 0.231186 | 8  | yellow |  |
| Yap5                   | 0.198903 | 8  | white  |  |
| Abf1                   | 0.104303 | 8  | white  |  |
| Fhl1                   | 0.102329 | 8  | white  |  |
| Mcm1                   | 0.272602 | 7  | red    |  |
| Fkh2                   | 0.260023 | 6  | red    |  |

| <b><i>p</i> = 0.001</b> |          |    |        |  |
|-------------------------|----------|----|--------|--|
| Ndd1                    | 0.298176 | 14 | red    |  |
| Swi6                    | 0.322294 | 13 | red    |  |
| Swi5                    | 0.221195 | 13 | red    |  |
| Swi4                    | 0.318195 | 12 | red    |  |
| Mbp1                    | 0.284134 | 11 | red    |  |
| Ace2                    | 0.298886 | 10 | red    |  |
| Bas1                    | 0.191755 | 10 | yellow |  |
| Fkh1                    | 0.229689 | 9  | yellow |  |
| Yox1                    | 0.177898 | 9  | yellow |  |
| Ste12                   | 0.234691 | 8  | yellow |  |
| Spt2                    | 0.231186 | 8  | yellow |  |
| Yap5                    | 0.198903 | 8  | white  |  |
| Abf1                    | 0.104303 | 8  | white  |  |
| Fhl1                    | 0.102329 | 8  | white  |  |
| Msn4                    | 0.076258 | 8  | white  |  |
| Mcm1                    | 0.272602 | 7  | red    |  |
| Fkh2                    | 0.260023 | 6  | red    |  |
