# Supplementary material for: Modelling the network of cell cycle transcription factors in the yeast Saccharomyces cerevisiae
Source: Springer Nature journal article supplement (doi:10.1186/1471-2105-7-381), 2006-08-16
Supplement: 12859_2006_1120_MOESM6_ESM.pdf [file 12859_2006_1120_MOESM6_ESM.pdf]

## Supplementary material

Let  $A$  be an  $n \times n$  real matrix and suppose  $A$  has not necessarily distinct eigenvalues  $\lambda_1, \dots, \lambda_n \in \mathbb{C}$  with  $1 = |\lambda_1| = |\lambda_2| > |\lambda_3| \geq \dots \geq |\lambda_n|$  and  $\mathbb{C}$ -linearly independent associated eigenvectors  $v_1, \dots, v_n \in \mathbb{C}^n \setminus \mathbf{0}$ . It is a fact that the non-real eigenvalues come in complex conjugate pairs and, further, we may assume without loss of generality that the eigenvectors associated to such a pair are themselves conjugates. Suppose  $\lambda_1$  and  $\lambda_2$  are non-real complex conjugates and write  $\lambda_1 = e^{i\theta}$ ,  $\lambda_2 = e^{-i\theta}$  with  $\theta \in \mathbb{R} \setminus \pi\mathbb{Z}$ .

Given initial conditions  $t_0 \in \mathbb{R}^n$ , we have the time evolution  $t_{k+1} := At_k \in \mathbb{R}^n$  for all  $k \in \mathbb{N}$ . We are interested in the asymptotic behavior of  $t_k$  for large  $k$ . Write  $V$  for the  $n \times n$  complex matrix whose successive columns are  $v_1, \dots, v_n$ . It can be shown that the rows  $w_1, \dots, w_n \in \mathbb{C}^n$  of  $W := V^{-1}$  corresponding to conjugate  $v_i$  are themselves conjugates.

For all  $k \in \mathbb{N}$ ,

$$\begin{aligned} t_k &= A^k t_0 = \left( V \begin{bmatrix} \lambda_1 & & \mathbf{0} \\ & \ddots & \\ \mathbf{0} & & \lambda_n \end{bmatrix} W \right)^k t_0 = V \begin{bmatrix} \lambda_1^k & & \mathbf{0} \\ & \ddots & \\ \mathbf{0} & & \lambda_n^k \end{bmatrix} W t_0 = V \begin{bmatrix} \lambda_1^k & & \mathbf{0} \\ & \lambda_2^k & \\ \mathbf{0} & & \ddots \\ & & & \mathbf{0} \end{bmatrix} W t_0 + O(|\lambda_3|^k) \\ &= [v_1 v_2] \begin{bmatrix} \lambda_1^k & \mathbf{0} \\ \mathbf{0} & \lambda_2^k \end{bmatrix} \begin{bmatrix} w_1^\top \\ w_2^\top \end{bmatrix} t_0 + O(|\lambda_3|^k) = e^{ik\theta} (w_1^\top t_0) v_1 + e^{-ik\theta} (w_2^\top t_0) v_2 + O(|\lambda_3|^k) \end{aligned}$$

so that for  $j \in 1..n$ ,

$$\begin{aligned} (t_k)_j &= (v_1)_j (w_1^\top t_0) e^{ik\theta} + (v_2)_j (w_2^\top t_0) e^{-ik\theta} + O(|\lambda_3|^k) \\ &= (v_1)_j (w_1^\top t_0) (\cos k\theta + i \sin k\theta) + \overline{(v_1)_j (w_1^\top t_0) (\cos k\theta + i \sin k\theta)} + O(|\lambda_3|^k) \\ &= 2 \operatorname{Re} \left( (v_1)_j (w_1^\top t_0) (\cos k\theta + i \sin k\theta) \right) + O(|\lambda_3|^k) \\ &= 2 \operatorname{Re} \left( (v_1)_j (w_1^\top t_0) \right) \cos k\theta - 2 \operatorname{Im} \left( (v_1)_j (w_1^\top t_0) \right) \sin k\theta + O(|\lambda_3|^k). \end{aligned}$$

Note for  $(\alpha, \beta) \in \mathbb{R} \setminus \mathbf{0}$  and  $\phi \in \mathbb{R}$  that

$$\begin{aligned} \alpha \cos \phi - \beta \sin \phi &= \sqrt{\alpha^2 + \beta^2} \left( \frac{\alpha}{\sqrt{\alpha^2 + \beta^2}} \cos \phi - \frac{\beta}{\sqrt{\alpha^2 + \beta^2}} \sin \phi \right) \\ &= \sqrt{\alpha^2 + \beta^2} ((\cos \arctan(\alpha, \beta)) \cos \phi - (\sin \arctan(\alpha, \beta)) \sin \phi) \\ &= \sqrt{\alpha^2 + \beta^2} \cos(\phi + \arctan(\alpha, \beta)) \end{aligned}$$

and so  $(t_k)_j = 2 |(v_1)_j (w_1^\top t_0)| \cos(k\theta + \arg((v_1)_j (w_1^\top t_0))) + O(|\lambda_3|^k)$ , assuming  $(v_1)_j (w_1^\top t_0) \neq 0$  (otherwise  $(t_k)_j = O(|\lambda_3|^k)$ , or alternatively assign some arbitrary value to  $\arg 0$ ).  $\square$
