# Supplementary material for: Modelling the network of cell cycle transcription factors in the yeast Saccharomyces cerevisiae
Source: Springer Nature journal article supplement (doi:10.1186/1471-2105-7-381), 2006-08-16

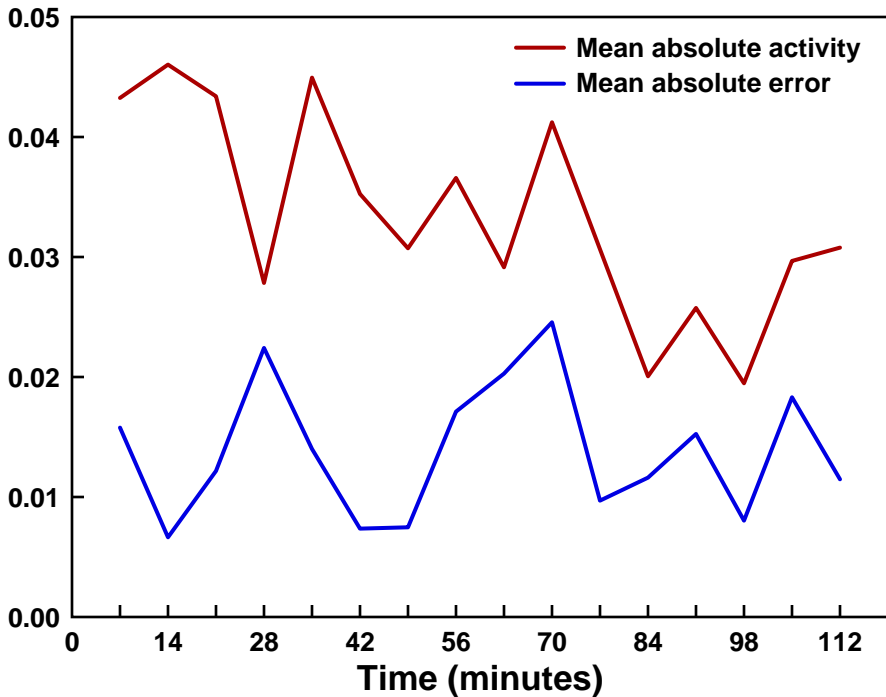

Supplement: 12859_2006_1120_MOESM11_ESM.pdf [file 12859_2006_1120_MOESM11_ESM.pdf]
